# Supplementary material
Source: PubMed Central journal article supplement (PMC8629162)
Supplement: mmc1.pdf [file mmc1.pdf]

## Supplemental information

### Immunogenicity of standard and extended dosing intervals of BNT162b2 mRNA vaccine

Rebecca P. Payne, Stephanie Longet, James A. Austin, Donal T. Skelly, Wanwisa Dejnirattisai, Sandra Adele, Naomi Meardon, Sian Faustini, Saly Al-Taei, Shona C. Moore, Tom Tipton, Luisa M. Hering, Adrienn Angyal, Rebecca Brown, Alexander R. Nicols, Natalie Gillson, Susan L. Dobson, Ali Amini, Piyada Supasa, Andrew Cross, Alice Bridges-Webb, Laura Silva Reyes, Aline Linder, Gurjinder Sandhar, Jonathan A. Kilby, Jessica K. Tyerman, Thomas Altmann, Hailey Hornsby, Rachel Whitham, Eloise Phillips, Tom Malone, Alexander Hargreaves, Adrian Shields, Ayoub Saei, Sarah Foulkes, Lizzie Stafford, Sile Johnson, Daniel G. Wootton, Christopher P. Conlon, Katie Jeffery, Philippa C. Matthews, John Frater, Alexandra S. Deeks, Andrew J. Pollard, Anthony Brown, Sarah L. Rowland-Jones, Juthathip Mongkolsapaya, Eleanor Barnes, Susan Hopkins, Victoria Hall, Christina Dold, Christopher J.A. Duncan, Alex Richter, Miles Carroll, Gavin Screaton, Thushan I. de Silva, Lance Turtle, Paul Klenerman, Susanna Dunachie, and on behalf of the PITCH Consortium

Table S1. Overview of assays performed and number of samples tested. Related to Figure 2-5.

|                                                         | Total participants (n=589) |                      |                    |                             |                      |                    |                              |
|---------------------------------------------------------|----------------------------|----------------------|--------------------|-----------------------------|----------------------|--------------------|------------------------------|
|                                                         | Naïve (n=334)              |                      |                    | Previously infected (n=255) |                      |                    |                              |
|                                                         | 2-dose +4 weeks            | Unpaired timecourse  | Paired timecourse  | 2-dose +4 weeks             | Unpaired timecourse  | Paired timecourse  | Total                        |
| SARS-CoV-2 spike IFN-gamma ELISpot                      | 37 short<br>188 long       | 47 short<br>229 long | 0 short<br>26 long | 20 short<br>124 long        | 26 short<br>139 long | 0 short<br>26 long | <b>83 short<br/>368 long</b> |
| SARS-CoV-2 spike antibody (MSD <sup>a</sup> )           | 41 short<br>151 long       | 51 short<br>183 long | 0 short<br>29 long | 19 short<br>169 long        | 29 short<br>199 long | 0 short<br>29 long | <b>80 short<br/>382 long</b> |
| Variant of Concern antibody (ELISpot)                   | 0 short<br>40 long         | 0                    | 0                  | 0 short<br>42 long          | 0                    | 0                  | <b>0 short<br/>82 long</b>   |
| Variant of Concern antibody (MSD <sup>a</sup> )         | 23 short<br>94 long        | 0                    | 0                  | 14 short<br>118 long        | 0                    | 0                  | <b>37 short<br/>212 long</b> |
| Variant of Concern antibody (Neutralisation)            | 19 short<br>20 long        | 25 short<br>20 long  | 0                  | 0                           | 0                    | 0                  | <b>25 short<br/>20 long</b>  |
| SARS-CoV-2 spike T cell intracellular cytokine staining | 23 short<br>30 long        | 0                    | 0                  | 14 short<br>19 long         | 0                    | 0                  | <b>37 short<br/>49 long</b>  |
| SARS-CoV-2 spike IgG ELISpot                            | 12 short<br>10 long        | 0 short<br>10 long   | 0                  | 0                           | 0                    | 0                  | <b>12 short<br/>10 long</b>  |

<sup>a</sup>MSD = Mesoscale Discovery (MSD) binding assays

**Table S2. Generalized linear models (GLM).** Table shows three GLM models of T cell (naïve and previously infected individuals), antibody (naïve individuals) and antibody (previously infected individual) responses at 4 weeks after second dose. Variables include age, sex, previous infection, Ethnicity and vaccine dose interval. Variable references are Sex ; F (Female) versus M (Male), Previously infected; Yes versus No, Ethnicity; White versus Black/Asian/Mixed/Other, and Vaccine dose interval; Short versus Long. Related to Figure 3.

| Coefficient                  | Spike T cell responses in naive and previously infected participants at dose-2 plus 4 weeks |                 |                  | Spike Antibody responses in naive participants at dose-2 plus 4 weeks |                 |                  | Spike Antibody responses in previously infected participants at dose-2 plus 4 weeks |                 |                  |
|------------------------------|---------------------------------------------------------------------------------------------|-----------------|------------------|-----------------------------------------------------------------------|-----------------|------------------|-------------------------------------------------------------------------------------|-----------------|------------------|
|                              | Estimates                                                                                   | Conf. Int (95%) | P-Value          | Estimates                                                             | Conf. Int (95%) | P-Value          | Estimates                                                                           | Conf. Int (95%) | P-Value          |
| Intercept                    | 2.38                                                                                        | 2.03 – 2.73     | <b>&lt;0.001</b> | 5.39                                                                  | 5.14 – 5.65     | <b>&lt;0.001</b> | 5.53                                                                                | 5.22 – 5.85     | <b>&lt;0.001</b> |
| Age                          | -0.01                                                                                       | -0.01 – 0.00    | 0.060            | -0.01                                                                 | -0.01 – -0.00   | 0.051            | 0.00                                                                                | -0.00 – 0.00    | 0.926            |
| Sex (M)                      | -0.04                                                                                       | -0.20 – 0.13    | 0.683            | -0.07                                                                 | -0.19 – 0.05    | 0.232            | 0.05                                                                                | -0.08 – 0.17    | 0.476            |
| Previously infected (Yes)    | 0.36                                                                                        | 0.19 – 0.52     | <b>&lt;0.001</b> |                                                                       |                 |                  |                                                                                     |                 |                  |
| Ethnicity (Black)            | 0.18                                                                                        | -0.55 – 0.91    | 0.623            | 0.05                                                                  | -0.63 – 0.72    | 0.893            | 0.13                                                                                | -0.19 – 0.46    | 0.416            |
| Ethnicity (Asian)            | -0.16                                                                                       | -0.42 – 0.09    | 0.203            | 0.05                                                                  | -0.16 – 0.27    | 0.645            | 0.10                                                                                | -0.08 – 0.28    | 0.258            |
| Ethnicity (Mixed)            | -0.16                                                                                       | -0.68 – 0.37    | 0.560            | 0.42                                                                  | -0.25 – 1.10    | 0.223            | -0.63                                                                               | -1.23 – -0.03   | <b>0.043</b>     |
| Ethnicity (Other)            | -0.05                                                                                       | -0.57 – 0.48    | 0.867            | -0.18                                                                 | -0.57 – 0.21    | 0.374            | 0.16                                                                                | -0.16 – 0.49    | 0.326            |
| Vaccine dose interval (Long) | -0.20                                                                                       | -0.42 – 0.01    | 0.060            | 0.19                                                                  | 0.05 – 0.32     | <b>0.007</b>     | -0.01                                                                               | -0.24 – 0.22    | 0.908            |
| Observations                 | 277                                                                                         |                 |                  | 143                                                                   |                 |                  | 139                                                                                 |                 |                  |
| R <sup>2</sup>               | 0.085                                                                                       |                 |                  | 0.131                                                                 |                 |                  | 0.058                                                                               |                 |                  |
